# Supplementary material
Source: PubMed Central journal article supplement (PMC4988525)
Supplement: NIHMS773332-supplement.pdf [file NIHMS773332-supplement.pdf]

# Unusual Fluorescent Responses of Morpholine-Functionalized Fluorescent Probes to pH via Manipulation of BODIPY's HOMO and LUMO Energy Orbitals for Intracellular pH Detection

*Jingtuo Zhang,<sup>†</sup> Mu Yang,<sup>†</sup> Wafa Mazi,<sup>†</sup> Kapil Adhikari,<sup>†</sup> Mingxi Fang,<sup>†</sup> Fei Xie,<sup>†</sup> Loredana Valenzano,<sup>‡\*</sup> Ashutosh Tiwari<sup>‡\*</sup>, Fen-Tair Luo<sup>‡\*</sup> and Haiying Liu<sup>†\*</sup>*

<sup>†</sup> Department of Chemistry, Michigan Technological University, Houghton, MI 49931

<sup>‡</sup> Institute of Chemistry, Academia Sinica, Taipei, Taiwan 11529, Republic of China

| Content:                                                                                                                                                                                                          | page        |
|-------------------------------------------------------------------------------------------------------------------------------------------------------------------------------------------------------------------|-------------|
| <b>I.</b> Synthetic procedures for fluorescent probes <b>A</b> , <b>B</b> and <b>C</b> , BODIPY dyes <b>4</b> and <b>6</b> .                                                                                      | S-2 ~ S-4   |
| <b>II.</b> Methods for optical measurements, Determination of $pK_a$ and MTS assay.                                                                                                                               | S-4 ~ S-5   |
| <b>III.</b> Table S1 Optical properties of fluorescent probes <b>A</b> , <b>B</b> and <b>C</b> .                                                                                                                  | S-5         |
| <b>IV.</b> $^1\text{H}$ - and $^{13}\text{C}$ -NMR spectra of intermediates, fluorescent probes <b>A</b> , <b>B</b> and <b>C</b> , BODIPY dyes <b>4</b> and <b>6</b> .                                            | S-6 ~ S-10  |
| <b>V.</b> Absorption and fluorescence spectra of BODIPY dyes <b>1</b> , <b>4</b> and <b>6</b> in aqueous solutions at different pH values.                                                                        | S-11        |
| <b>VI.</b> Absorption and fluorescence spectra of 5 $\mu\text{M}$ fluorescent probes <b>A</b> , <b>B</b> and <b>C</b> in the absence and presence of various metal cations at pH 7.4 or pH 4.0.                   | S-12 ~ S-14 |
| <b>VII.</b> Cytofluorogram of fluorescence images of cells incubated with different concentrations of fluorescent probe <b>C</b> and 1 $\mu\text{M}$ LysoSensor Green DND-189 for verifying their co-localization | S-14 ~ S-15 |
| <b>VIII.</b> Fluorescence images of living cells incubated with various concentrations of fluorescent probe <b>C</b> .                                                                                            | S-16 ~ S-18 |
| <b>IX.</b> Reference                                                                                                                                                                                              | S-18 ~ S-19 |

## Synthesis:

**Probe A:** To a solution of compound **2** (0.9 mmol, 113 mg) in anhydrous THF (1 mL) was added ethylmagnesium bromide (0.9 mmol, 0.9 mL of 1.0 M solution). When the mixture was heated at 60 °C for 2 hours and cooled down to room temperature, this freshly made Grignard reagent was transferred to a Schlenk flask containing a solution of BODIPY dye **1** (100 mg, 0.15 mmol) in anhydrous THF (2 mL) via cannula under nitrogen protection. The resulting mixture was stirred at 60 °C overnight until complete consumption of the starting material which was monitored by TLC plates. When water (10 mL) was added to the mixture, the resulting mixture was extracted with CH<sub>2</sub>Cl<sub>2</sub> (25 mL). The organic layer was washed with water (50 mL) and brine solution (50 mL), dried over anhydrous Na<sub>2</sub>SO<sub>4</sub> and filtered. The filtrate was concentrated under reduced pressure and the crude product was purified by column chromatography using CH<sub>2</sub>Cl<sub>2</sub>/MeOH (9:0.5, v/v) as eluent to yield fluorescent probe **A** as orange oil (29 mg, 23%).

**BODIPY dye 4:** A mixture of DMF (10.0 mL) and POCl<sub>3</sub> (10.0 mL) was stirred in an ice bath for ten minutes under an argon atmosphere. The mixture was warmed to room temperature and further stirred for 35 minutes. After adding BODIPY dye **3** (600 mg, 0.93 mmol) in ClCH<sub>2</sub>CH<sub>2</sub>Cl (70 mL) to the reaction mixture, the resulting mixture was stirred at 50 °C for two hours. The reaction mixture was cooled down to room temperature and then was slowly poured into saturated NaHCO<sub>3</sub> aqueous solution at 0 °C in an ice bath. The mixture was warmed to room temperature and was further stirred for 2 hours until no more bubble was generated. The mixture was then washed with water and brine solution. The organic layers were combined, dried over anhydrous Na<sub>2</sub>SO<sub>4</sub>, and concentrated under reduced pressure to give crude intermediate BODIPY dye. This crude intermediate BODIPY dye was used directly for the next step reaction without any purification. The BODIPY dye **4** was prepared from the crude product in the last step by the similar procedures but was run at higher temperature of 60 °C for 4 hours instead of 50 °C for 2 hours. The crude product was purified by column chromatography using hexanes/CH<sub>2</sub>Cl<sub>2</sub>/acetone/EtOH (4/2/2/0.5, v/v/v/v) as eluent to yield BODIPY **4** as deep red oil (295 mg, overall yield: 45%). <sup>1</sup>H NMR (400 MHz, CDCl<sub>3</sub>): δ 9.97 (s, 2H), 6.92 (d, *J* = 8 Hz, 1H), 6.63 – 6.60 (m, 2H), 4.13 (t, *J* = 4.8 Hz, 2H), 4.02 (t, *J* = 4.8 Hz, 2H), 3.84 (t, *J* = 4.8 Hz, 2H), 3.71 – 3.58 (m, 8H), 3.50 – 3.47 (m, 2H), 3.44 – 3.28 (m, 11H), 3.25 (s, 3H), 2.27 (s, 6H), 1.78 (s, 6H). <sup>13</sup>C NMR (100 MHz, CDCl<sub>3</sub>): δ 185.8, 162.0, 159.9, 156.4, 148.0, 145.2, 132.5, 129.4,

127.7, 114.9, 107.0, 100.9, 70.6, 69.6, 67.8, 59.0, 58.9, 13.4, 11.6. HRMS (ESI): calculated for  $C_{35}H_{47}BF_2N_2O_{10}Na$   $[M+Na]^+$ , 727.3184; found, 727.3196.

**Fluorescent probe B:** A mixed solution of BODIPY **4** (100 mg, 0.14 mmol) and morpholine (75 mg, 0.84 mmol) in 30 mL dry  $ClCH_2CH_2Cl$  was stirred at 50 °C for 4 hours. When  $NaBH(OAc)_3$  (118 mg, 0.56 mmol) and acetic acid (1 drop) were added to the flask at room temperature, the mixture was stirred overnight at room temperature, diluted with  $CH_2Cl_2$  and washed with water and brine solutions. The organic layer was collected, dried over  $Na_2SO_4$  and concentrated in reduced pressure. The crude product was purified by column chromatograph using  $CH_2Cl_2/MeOH$ , (9/0.5, v/v) as eluent to obtain fluorescent probe **B** as deep orange oil (72 mg, 61%).

**BODIPY dye 6:** When BODIPY dye **4** (88 mg, 0.125 mmol), compound **5** were dissolved in a mixture of toluene (30 mL), piperidine (0.2 mL) and acetic acid (0.2 mL), the reaction mixture was refluxed at 120 °C for 3 hours. Any water formed during the reaction was removed azeotropically by using a Dean-Stark apparatus. After the reaction was quenched by water (5 mL) at room temperature, the mixture was concentrated under reduced pressure and re-dissolved in  $CH_2Cl_2$  (100 mL). It was then washed sequentially with saturated  $NH_4Cl$  solution (100 mL), water (100 mL) and brine solution (100 mL), dried over anhydrous  $Na_2SO_4$  and filtered. The filtrate was concentrated under reduced pressure and the crude product was purified by column chromatography using hexane/ $CH_2Cl_2$ /acetone/EtOH (3/3/2/0.7, v/v/v/v) as eluent to obtain BODIPY dye **6** as violet color oil (35 mg, 10.4%).  $^1H$  NMR (400 MHz,  $CDCl_3$ ):  $\delta$  9.88 (s, 2H), 7.10 (d,  $J$  = 8 Hz, 1H), 6.64 – 6.58 (m, 5H), 6.52 (d,  $J$  = 16 Hz, 2H), 6.43 (d,  $J$  = 2.4 Hz, 1H), 5.96 (d,  $J$  = 16 Hz, 2H), 4.14 (t,  $J$  = 4.8 Hz, 4H), 4.07 (t,  $J$  = 4.8 Hz, 4H), 3.94 – 3.40 (m, 64H), 3.38 – 3.32 (m, 18H), 3.30 (s, 3H), 2.91 (s, 6H).  $^{13}C$  NMR (100 MHz,  $CDCl_3$ ):  $\delta$  186.9, 161.9, 159.8, 157.5, 150.0, 148.9, 147.5, 142.0, 140.0, 132.2, 131.1, 129.5, 126.4, 120.7, 116.9, 115.0, 114.0, 112.6, 107.2, 100.2, 71.9, 71.7, 70.8, 70.7, 70.6, 70.5, 70.3, 69.6, 69.5, 68.7, 58.9. HRMS (ESI): calculated for  $C_{77}H_{111}BF_2N_2O_{26}Na$   $[M+Na]^+$ , 1551.7378; found, 1551.7388.

**Fluorescent probe C:** A mixed solution of BODIPY **6** (30 mg, 0.02 mmol) and morpholine (15 mg, 0.17 mmol) in 8 mL of dry  $ClCH_2CH_2Cl$  was stirred at 50 °C for 8 hours. When  $NaBH(OAc)_3$  (30 mg, 0.112 mmol) and acetic acid (1 drop) were added to the flask at room temperature, the mixture was stirred for 24 hours at room temperature, diluted with  $CH_2Cl_2$  and washed with water and brine solution. The organic layer was collected, dried over anhydrous

Na<sub>2</sub>SO<sub>4</sub> and concentrated in reduced pressure. The crude product was purified by preparative TLC plate (CH<sub>2</sub>Cl<sub>2</sub>/MeOH, 9/0.5, v/v) to obtain fluorescent probe **C** (15 mg, 45%).

### Optical Measurement:

The UV-Vis absorption spectra of fluorescent probes **A**, **B** and **C** for pH dependency, selectivity, photostability and solvent effect measurements were collected in the range from 300 to 800 nm with increments of 1 nm. Their corresponding fluorescence spectra were collected at the excitation wavelength of 470 nm, 490 nm, and 580 nm for fluorescent probes **A**, **B** and **C** with increments of 1 nm, respectively. The excitation and emission slit widths were set up to 3 nm. The concentration of the dye in each sample is 5 µM. Sulforhodamine 101 dye ( $\Phi_f = 95\%$  with excitation wavelength at 577 nm in ethanol)<sup>1</sup> was used as a reference standard to determine the fluorescence quantum yields of fluorescent probe **C** in ethanol and buffer solutions. Rhodamine 6G ( $\Phi_f = 95\%$  in ethanol)<sup>2, 3</sup> was used as a reference standard to determine the fluorescence quantum yields of fluorescent probes **A** and **B** in ethanol and buffer solutions. Both samples and references were freshly prepared under identical conditions. The fluorescence quantum yields were calculated using the following equation:

$$\Phi_X = \Phi_{st}(Grad_X/Grad_{st})(\eta_X^2/\eta_{st}^2)$$

Where the subscripts ‘*st*’ and ‘*X*’ stand for standard and test, respectively,  $\Phi$  is the fluorescence quantum yield, “*Grad*” represents the gradient from the plot of integrated fluorescence intensity versus absorbance and  $\eta$  is the refractive index of the solvent.

### Determination of pK<sub>a</sub> by fluorometric titration

The constants  $K_a$  of fluorescent probes **A**, **B** and **C** were determined in buffer solutions by fluorometric titration as a function of pH using the fluorescence spectra. The expression of the steady-state fluorescence intensity  $F$  as a function of the proton concentration has been extended for the case of a n: 1 complex between H<sup>+</sup> and a fluorescent probe, which expressed by the equation as below:<sup>4</sup>

$$F = \frac{F_{min}[H^+]^n + F_{max}K_a}{K_a + [H^+]^n}$$

$F_{min}$  and  $F_{max}$  stand for the fluorescence intensities at maximal and minimal H<sup>+</sup> concentrations, respectively, and  $n$  is apparent stoichiometry of H<sup>+</sup> binding to the probe which

affects the fluorescent change. Nonlinear fitting of equation expressed above to the fluorescence titration data recoded as a function of  $H^+$  concentration with  $K_a$  and  $n$  as free adjustable parameters yields the estimated apparent constant of  $K_a$ .

### MTS assay:

MTS assay was performed with HUVEC-C cells (from ATCC). The cells were plated at a density of 5,000 cells/well on a 96-well cell culture plate and incubated at 37 °C in 5% CO<sub>2</sub> incubator overnight. After incubation, the media was removed and the cells were washed with 1X PBS. Fresh media with 0  $\mu$ M, 5  $\mu$ M, 15  $\mu$ M, 25  $\mu$ M, or 50  $\mu$ M of fluorescent probe **C** dissolved in DMSO (with less than <0.5% DMSO final concentration in media) were added to the wells and measured in 6 replicates for each dye concentration. Blanks used for background subtraction had everything else except the cells and were prepared at the same time. The plates were incubated at 37 °C in 5% CO<sub>2</sub> incubator for 48 h. After the 48-hour incubation, 20  $\mu$ L of MTS solution (from CellTiter 96 Aqueous Non-Radioactive Cell proliferation Assay (MTS) kit, Promega) was added to each well. The absorbance at 490 nm was acquired after 4 h incubation at 37 °C, using an ELISA plate reader (BioTek Instruments, Inc.). Plots were normalized to control wells containing media and cells only.

**Table S1.** Optical properties of fluorescent probes **A**, **B** and **C**.

|                | <b>solvent</b>  | <b><math>\lambda_{abs}</math> (nm)</b> | <b><math>\lambda_{em}</math> (nm)</b> | <b><math>\epsilon_{max}</math> (<math>10^4 M^{-1}cm^{-1}</math>)</b> | <b><math>\Phi_f</math> (%)</b> |
|----------------|-----------------|----------------------------------------|---------------------------------------|----------------------------------------------------------------------|--------------------------------|
| Probe <b>A</b> | Ethanol         | 498                                    | 508                                   | 7.89                                                                 | 56                             |
|                | Buffer (pH 7.4) | 501                                    | 506                                   | 7.48                                                                 | 18                             |
|                | Buffer (pH 4.0) | 495                                    | 507                                   | 7.62                                                                 | 5.4                            |
| Probe <b>B</b> | Ethanol         | 515                                    | 529                                   | 10.03                                                                | 8.0                            |
|                | Buffer (pH 7.4) | 511                                    | 523                                   | 7.86                                                                 | 1.3                            |
|                | Buffer (pH 4.0) | 502                                    | 514                                   | 9.74                                                                 | 0.14                           |
| Probe <b>C</b> | Ethanol         | 565                                    | 652                                   | 3.15                                                                 | 8.6                            |
|                | Buffer (pH 7.4) | 550                                    | 665                                   | 5.06                                                                 | 0.32                           |
|                | Buffer (pH 4.0) | 532                                    | 654                                   | 5.12                                                                 | 0.036                          |

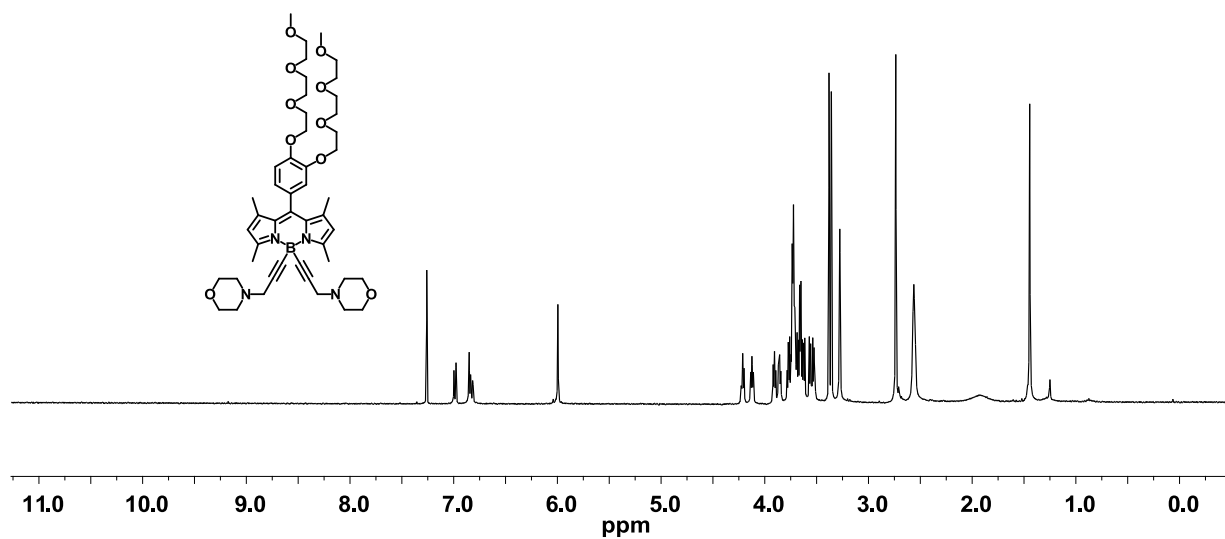

**Figure S1.** <sup>1</sup>H NMR spectrum of fluorescent probe A in CDCl<sub>3</sub> solution

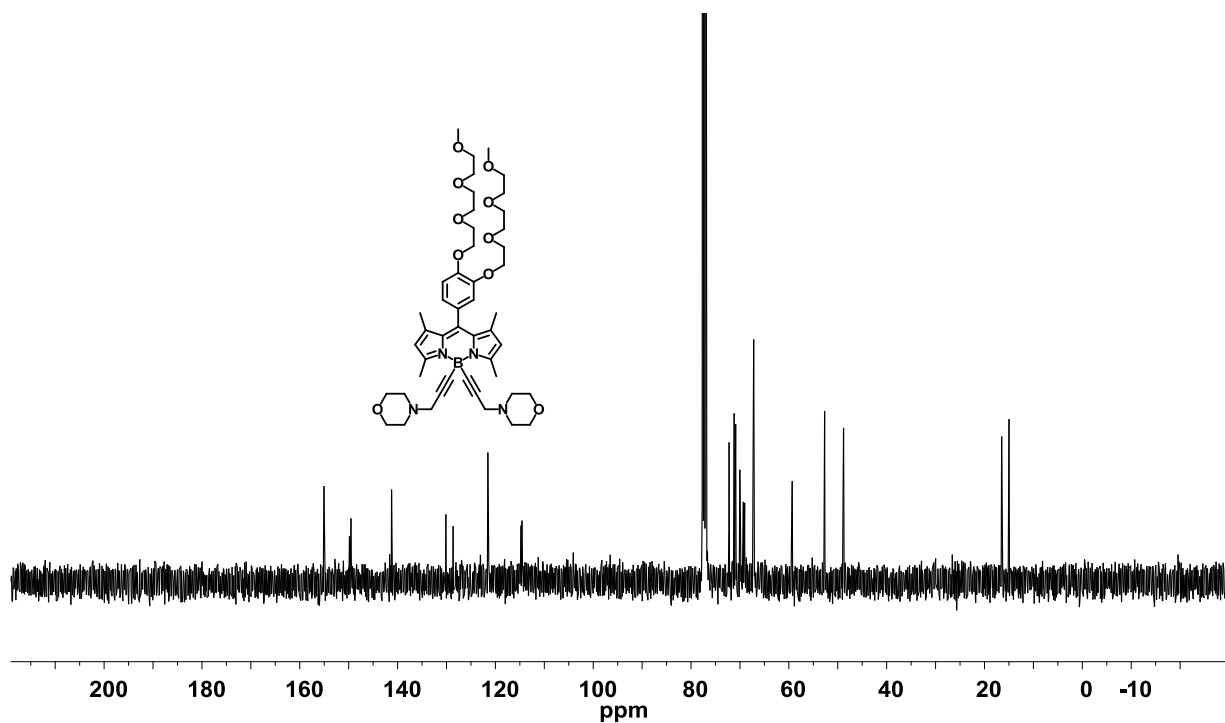

**Figure S2.** <sup>13</sup>C NMR spectrum of fluorescent probe A in CDCl<sub>3</sub> solution

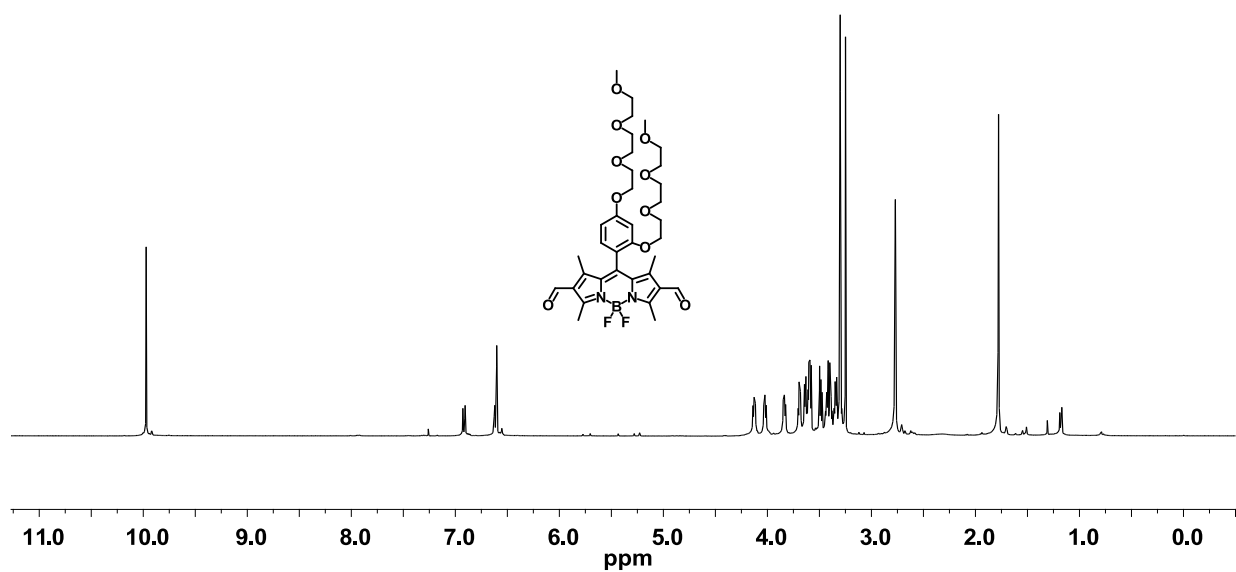

**Figure S3.**  $^1\text{H}$  NMR spectrum of BODIPY dye **4** in  $\text{CDCl}_3$  solution

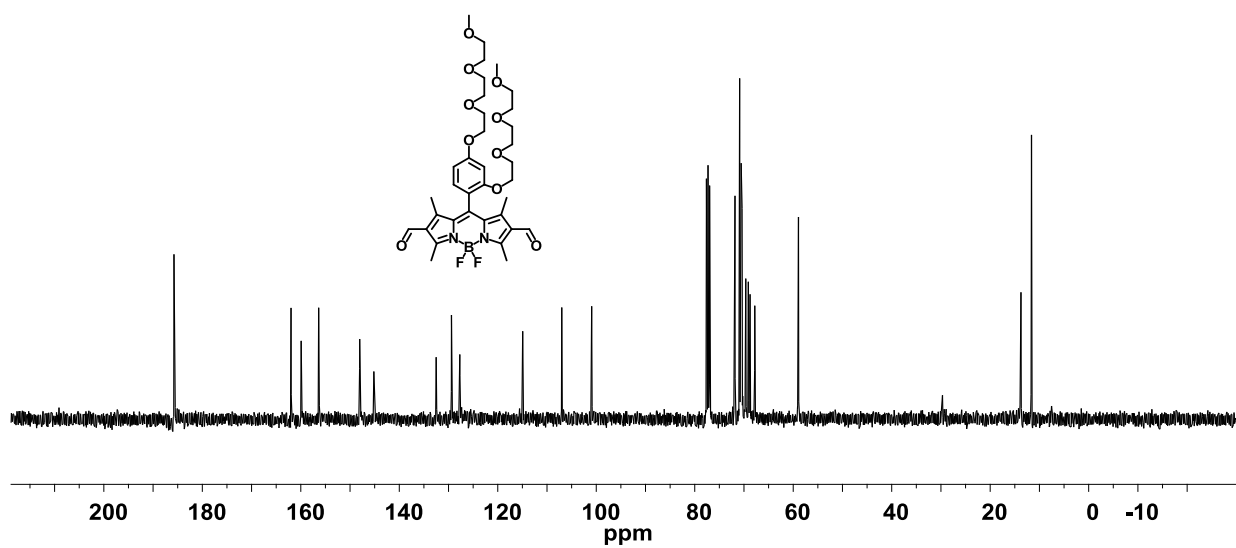

**Figure S4.**  $^{13}\text{C}$  NMR spectrum of BODIPY dye **4** in  $\text{CDCl}_3$  solution

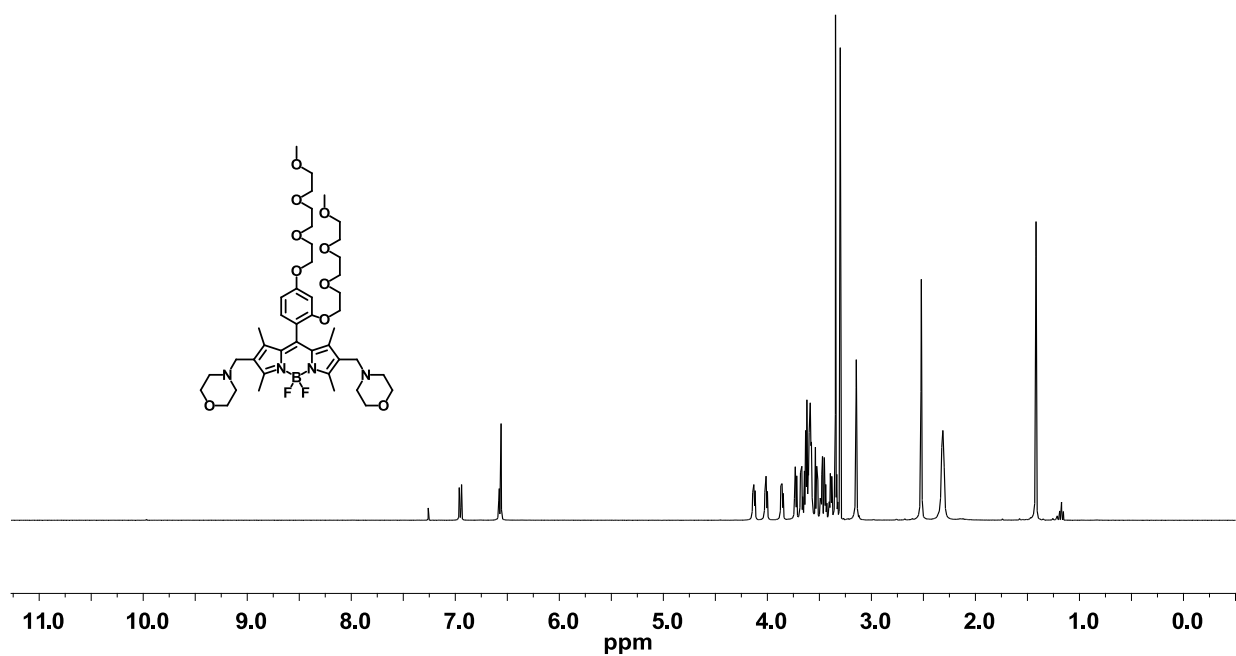

**Figure S5.**  $^1\text{H}$  NMR spectrum of fluorescent probe **B** in  $\text{CDCl}_3$  solution

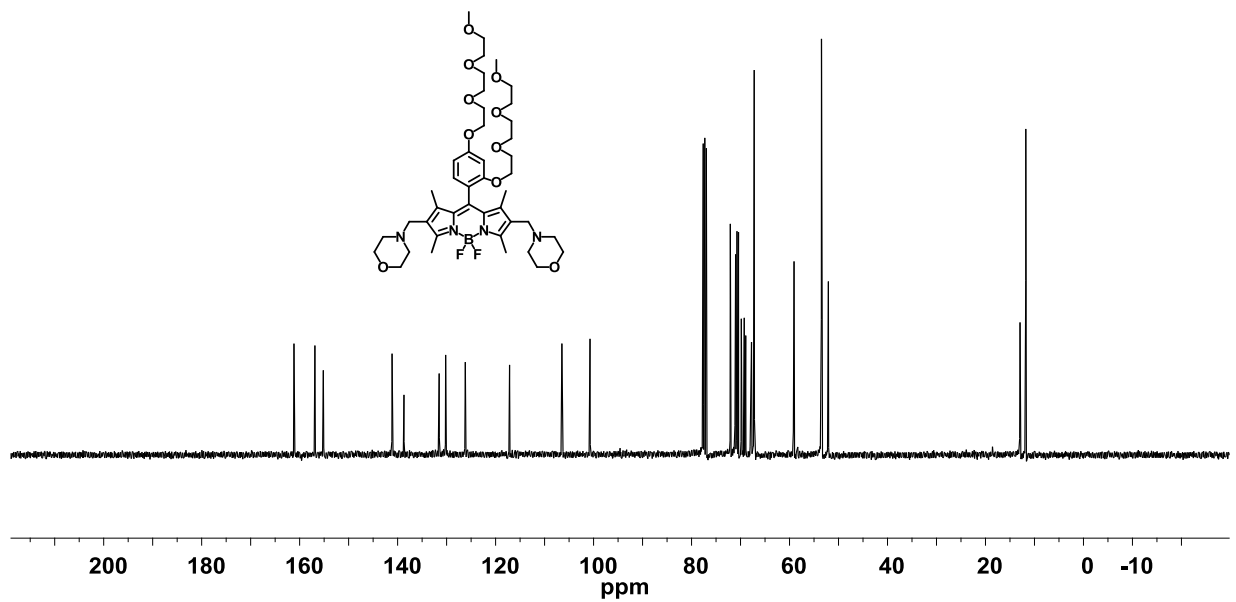

**Figure S6.**  $^{13}\text{C}$  NMR spectrum of fluorescent probe **B** in  $\text{CDCl}_3$  solution

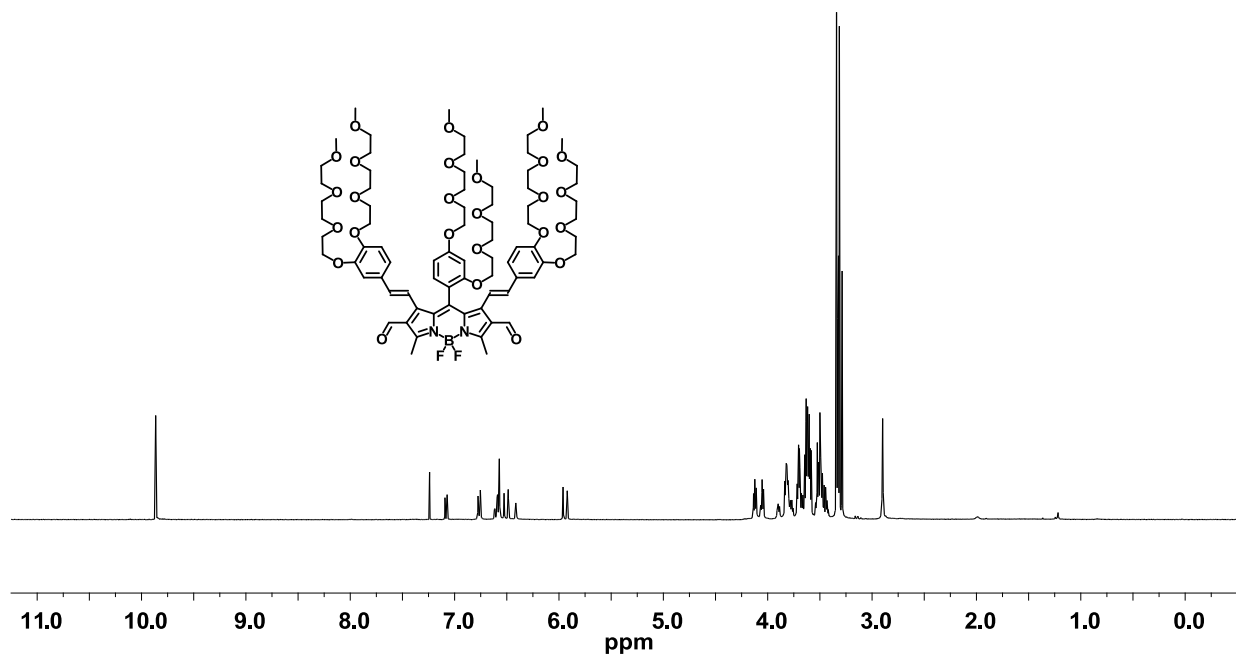

**Figure S7.**  $^1\text{H}$  NMR spectrum of BODIPY dye **6** in  $\text{CDCl}_3$  solution.

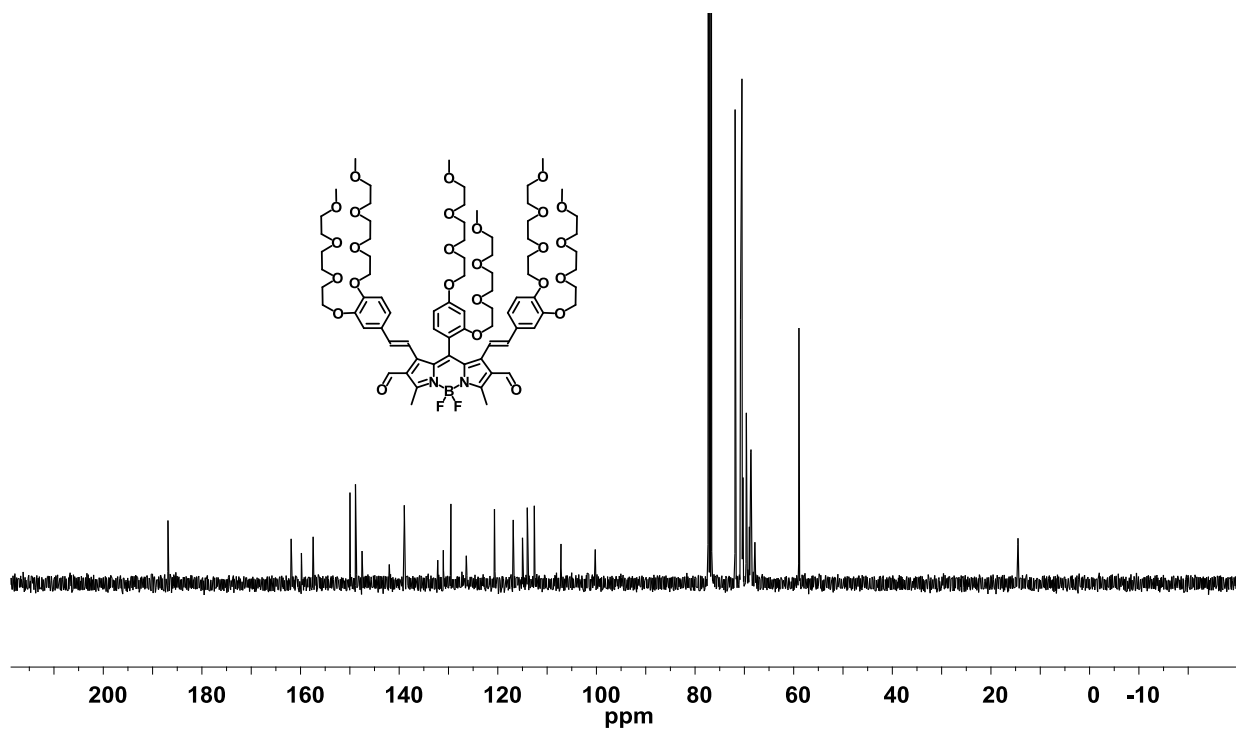

**Figure S8.**  $^{13}\text{C}$  NMR spectrum of BODIPY dye **6** in  $\text{CDCl}_3$  solution.

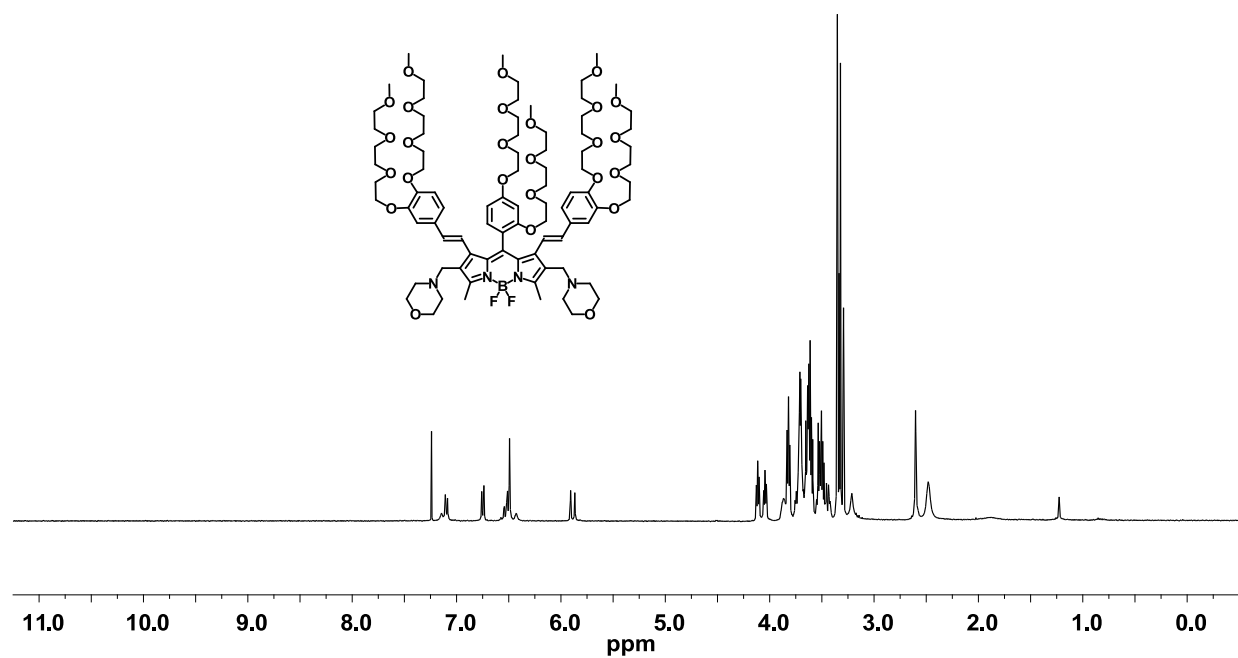

**Figure S9.**  $^1\text{H}$  NMR spectrum of fluorescent probe **C** in  $\text{CDCl}_3$  solution.

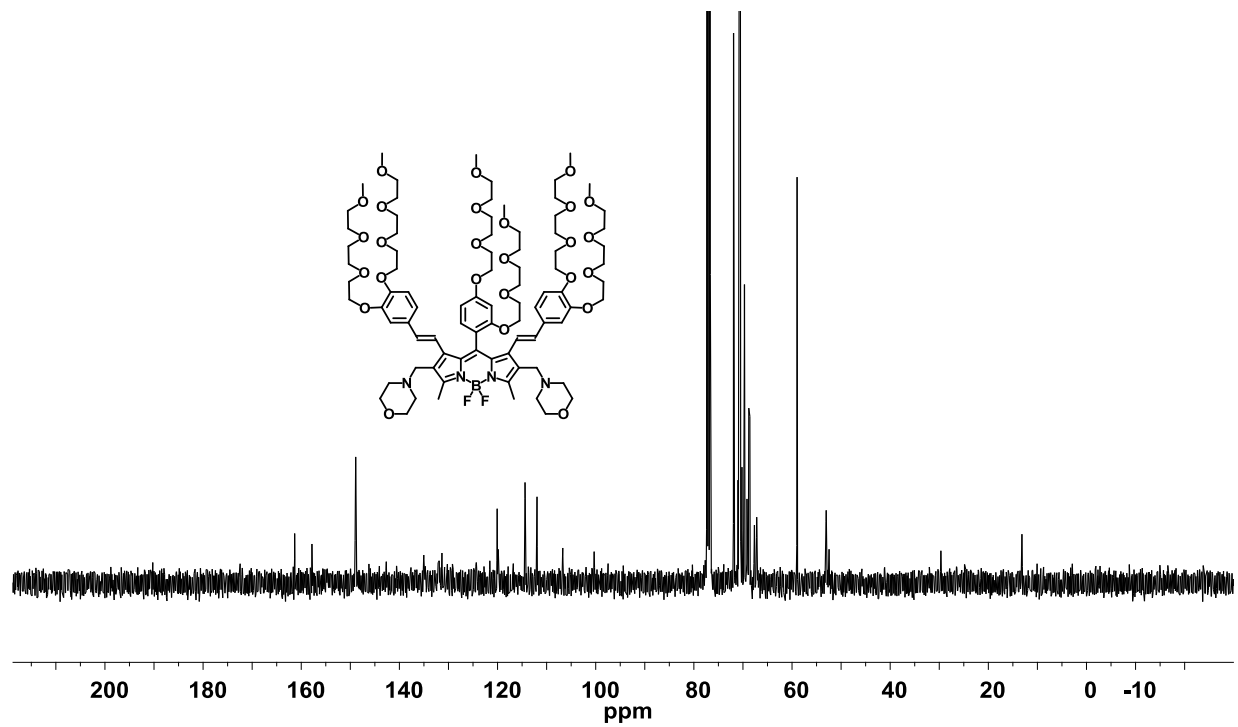

**Figure S10.**  $^{13}\text{C}$  NMR spectrum of fluorescent probe **C** in  $\text{CDCl}_3$  solution.

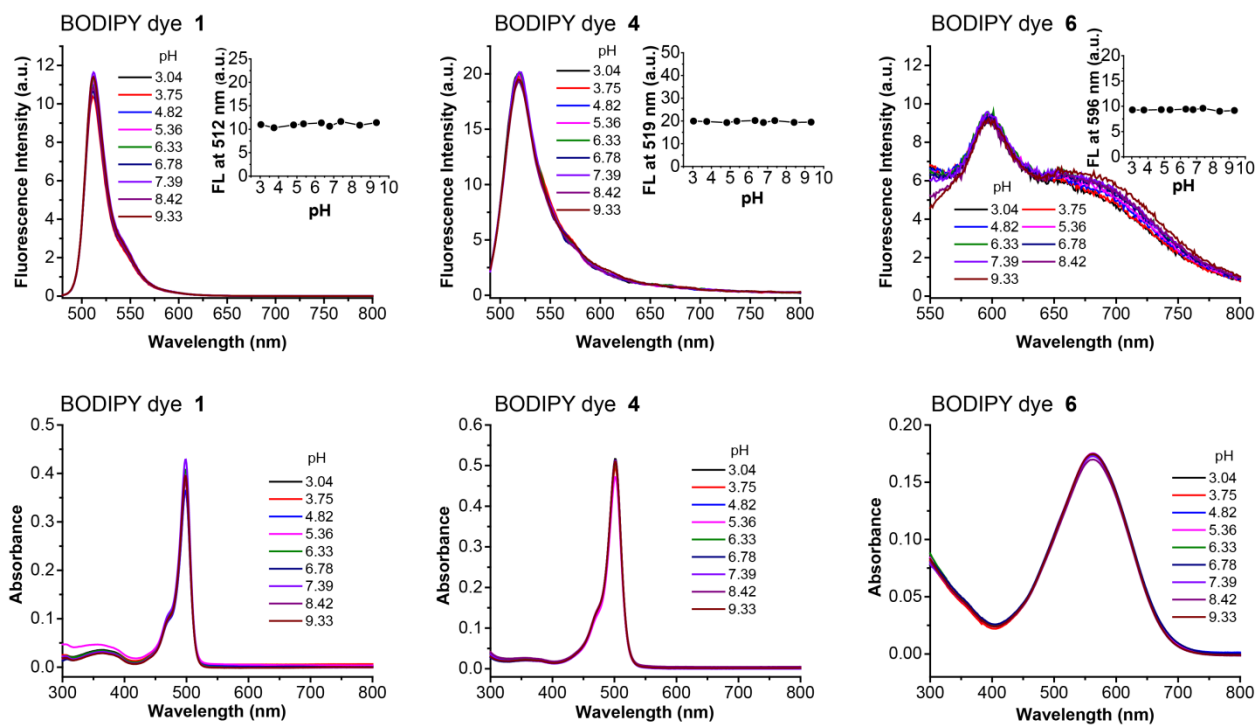

**Figure S11.** Absorption and emission spectra of BODIPY dyes **1**, **4** and **6** (5  $\mu$ M) in buffer solution at different pH values. The inset graphs in upper row are the corresponding changes fluorescence intensity at peak wavelengths at different pH conditions.

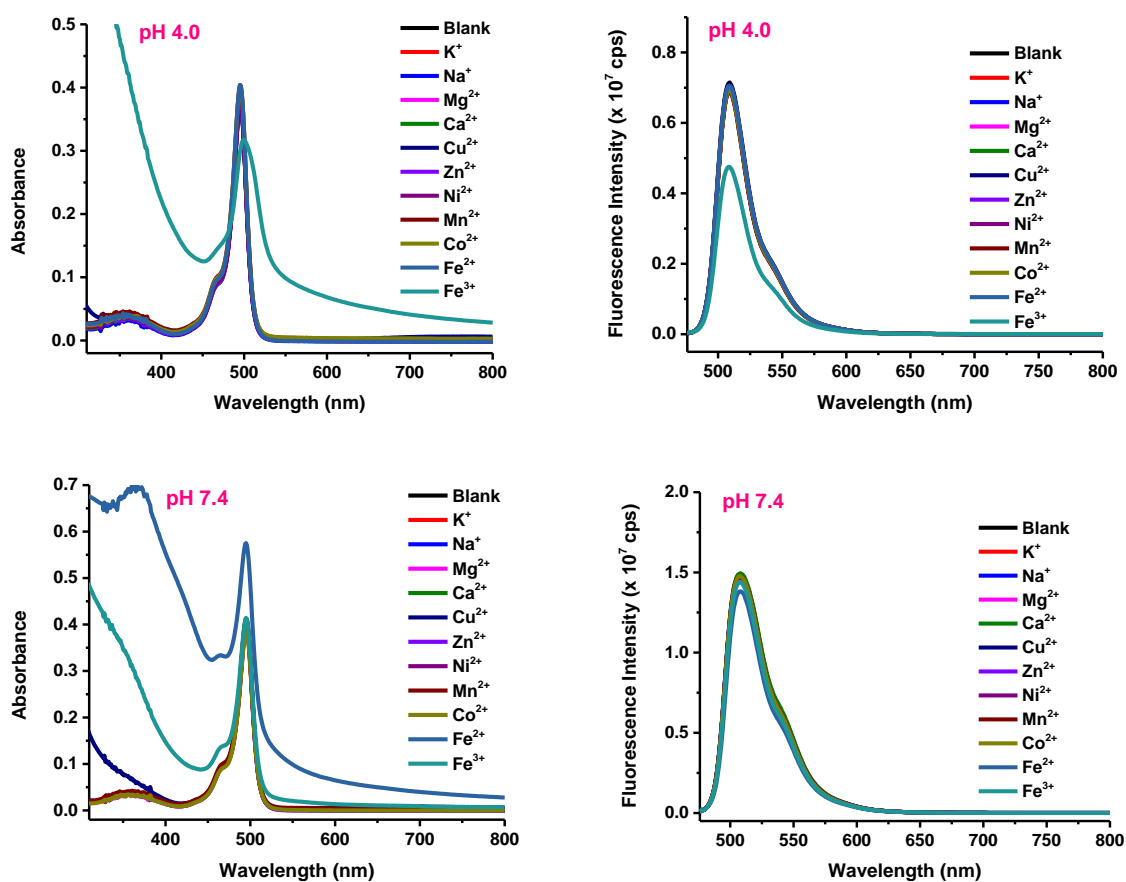

**Figure S12.** Absorption and emission spectra of fluorescent probe **A** (5  $\mu\text{M}$ ) in the presence of various metal cations (200  $\mu\text{M}$ ) in buffer solution at pH 4.0 (upper row) and pH 7.4 (lower row).

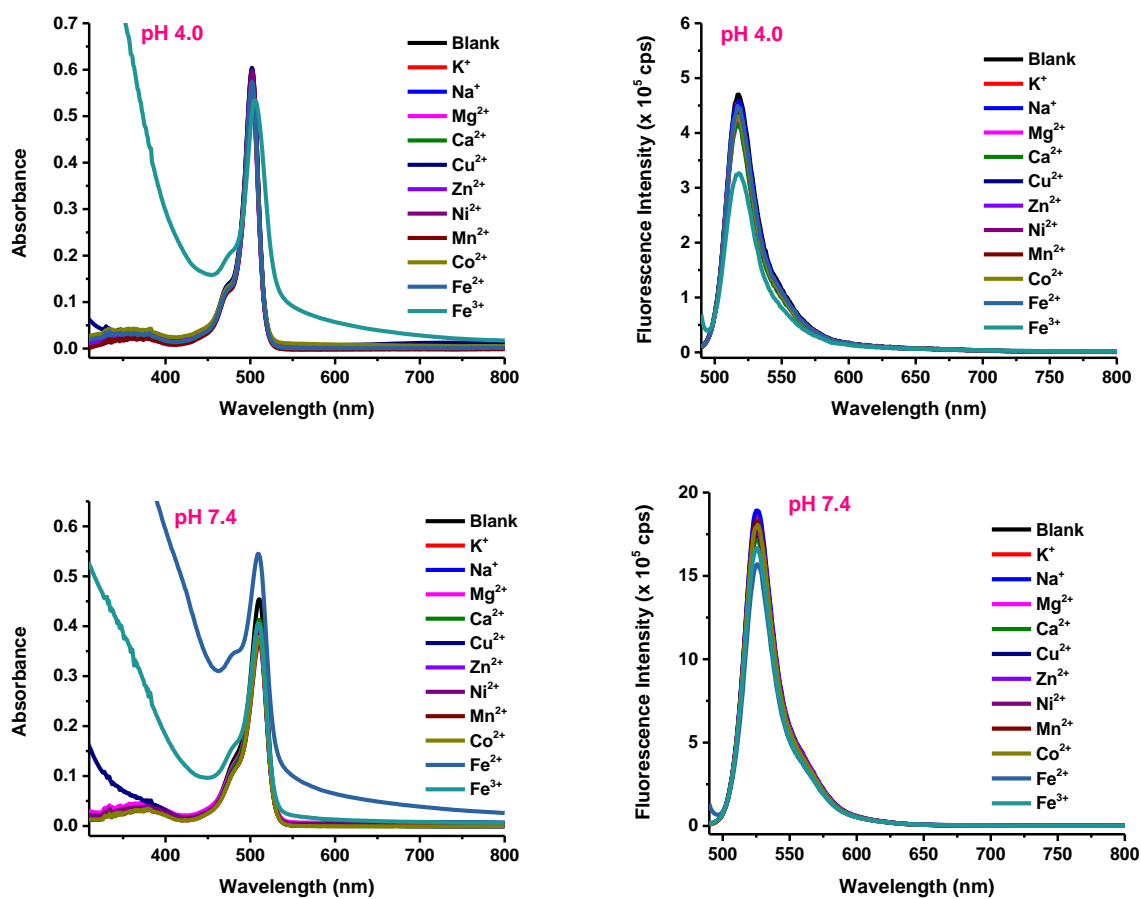

**Figure S13.** Absorption and emission spectra of fluorescent probe **B** (5  $\mu\text{M}$ ) in the presence of various metal cations (200  $\mu\text{M}$ ) in buffer solution at pH 4.0 (upper row) and pH 7.4 (lower row).

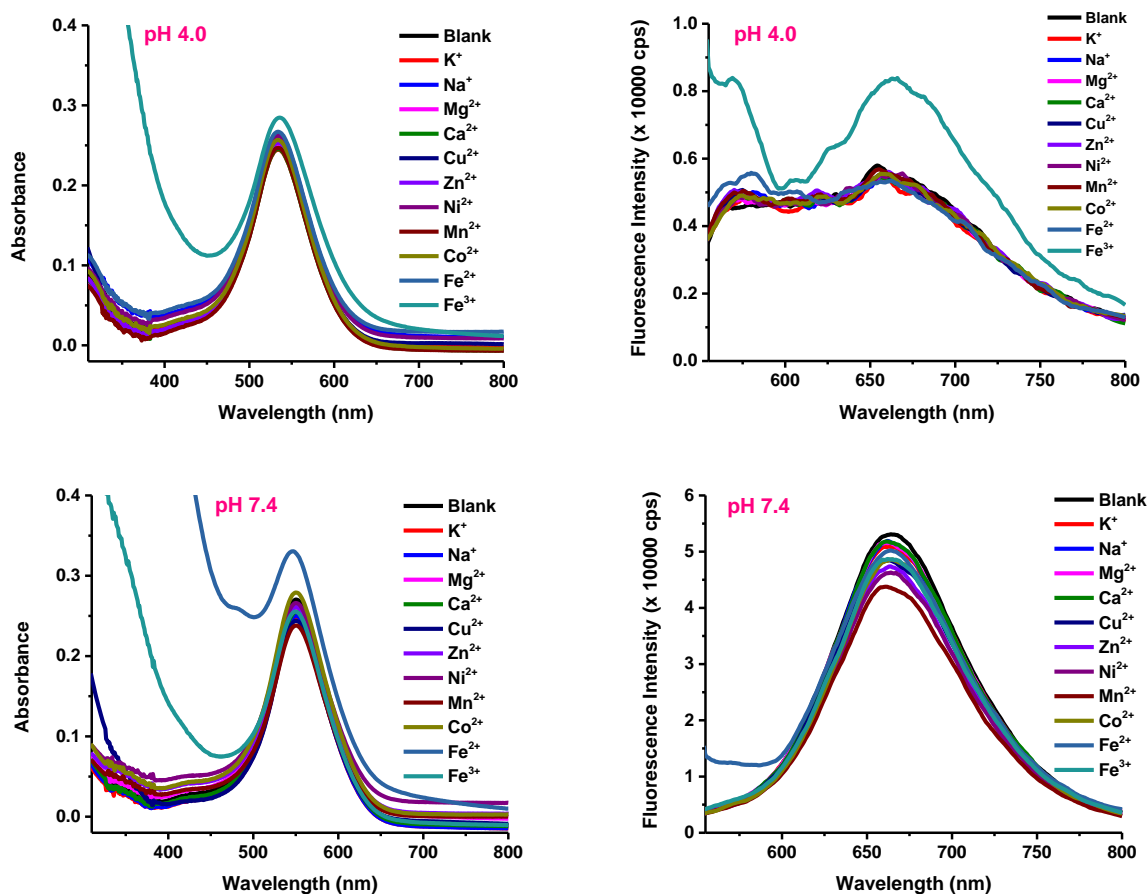

**Figure S14.** Absorption and emission spectra of fluorescent probe C (5 μM) in the presence of various metal cations (200 μM) in buffer solution at pH 4.0 (upper row) and pH 7.4 (lower row).

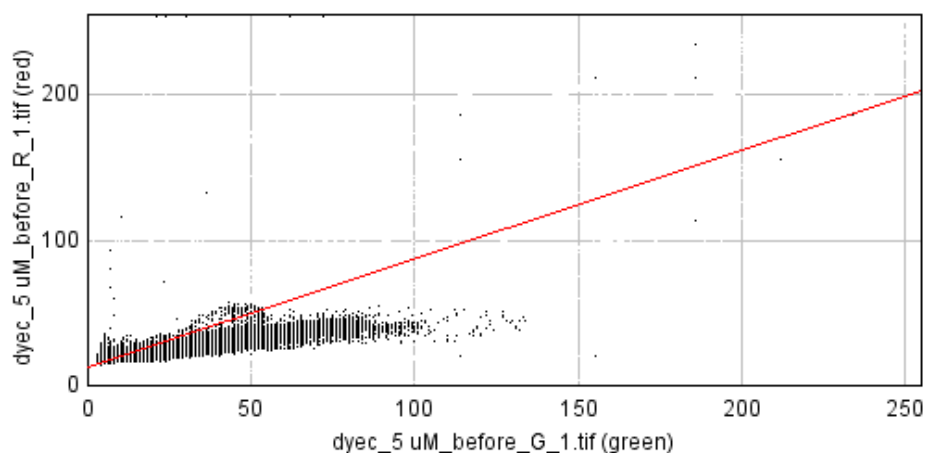

**Figure S15.** Red and green channel cytofluorogram of fluorescence images of cells incubated with 5 μM fluorescent probe C and 1 μM LysoSensor Green DND-189 for verifying their co-localization.

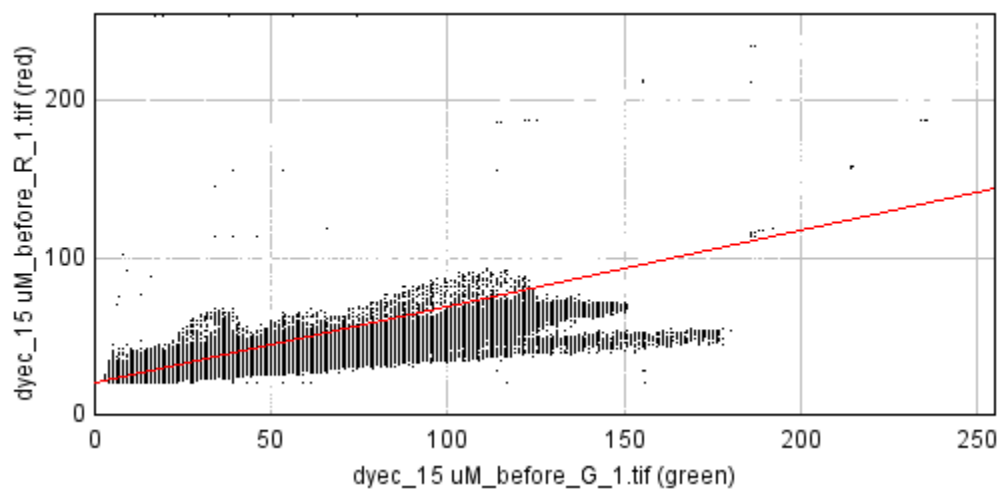

**Figure S16.** Red and green channel cytofluorogram of fluorescence images of cells incubated with 15  $\mu$ M fluorescent probe **C** and 1  $\mu$ M LysoSensor Green DND-189 for verifying their co-localization.

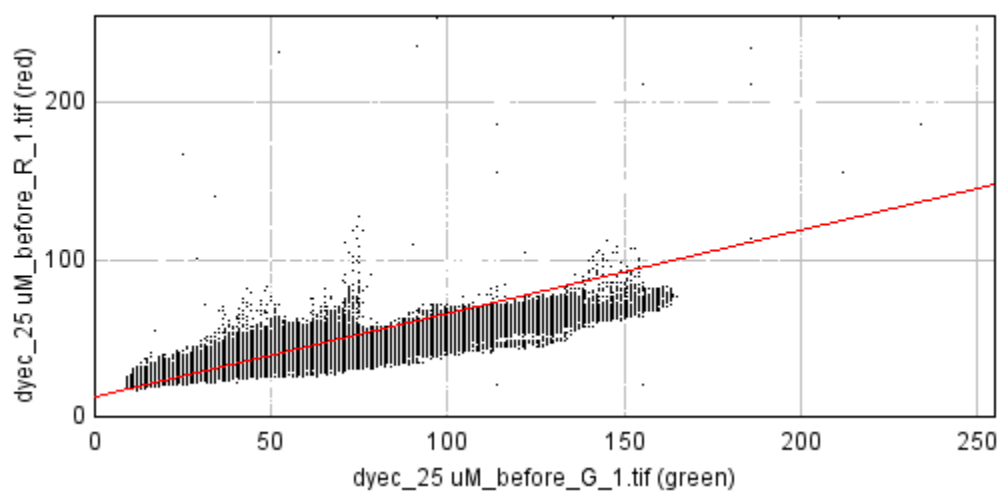

**Figure S17.** Red and green channel cytofluorogram of fluorescence images of cell incubated with 25  $\mu$ M fluorescent probe **C** and 1  $\mu$ M LysoSensor Green DND-189 for verifying their co-localization.

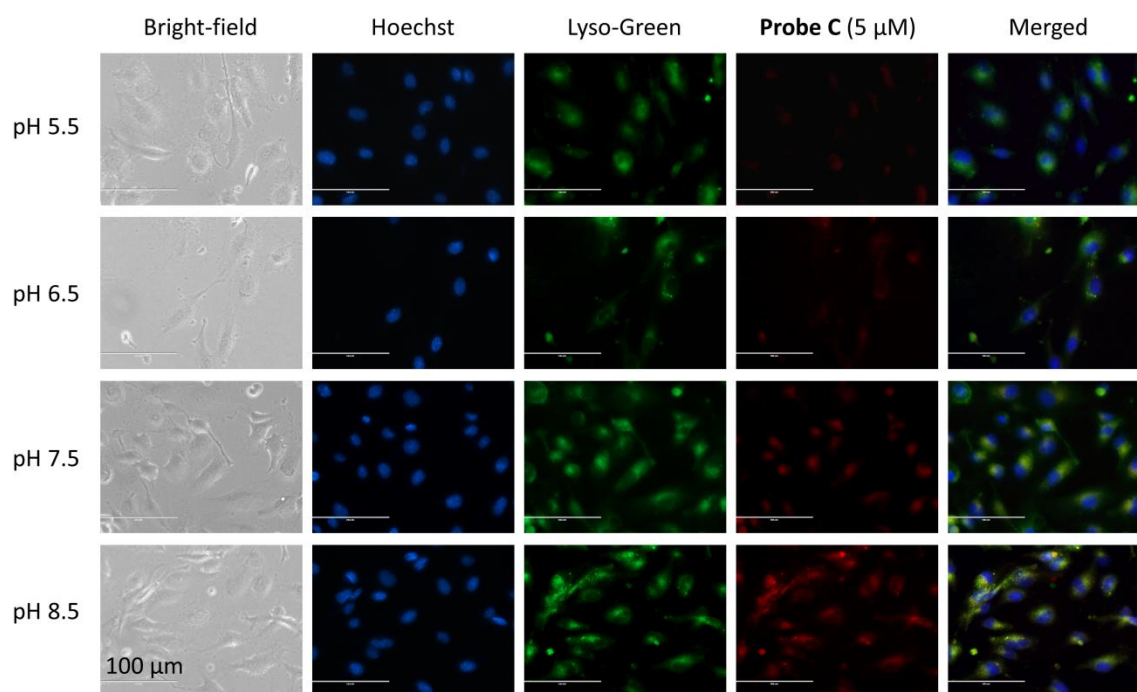

**Figure S18.** Fluorescence images of HUVEC-C cells incubated with 5 μM fluorescent probe **C** at different intracellular pH values. Intracellular pH were tuned by using nigericin (5 μg·mL<sup>-1</sup>) in 2 mL potassium rich PBS at different pH values (5.5, 6.5, 7.5, or 8.5). HUVEC-C cells were incubated with fluorescent probe **C** for 2 h and imaged for colocalization with 1 μM LysoSensor Green and (1 μg·mL<sup>-1</sup>) Hoechst 33342 stains. Images were acquired using the inverted fluorescence microscope (AMF-4306, EVOSfl, AMG) at 40× magnification.

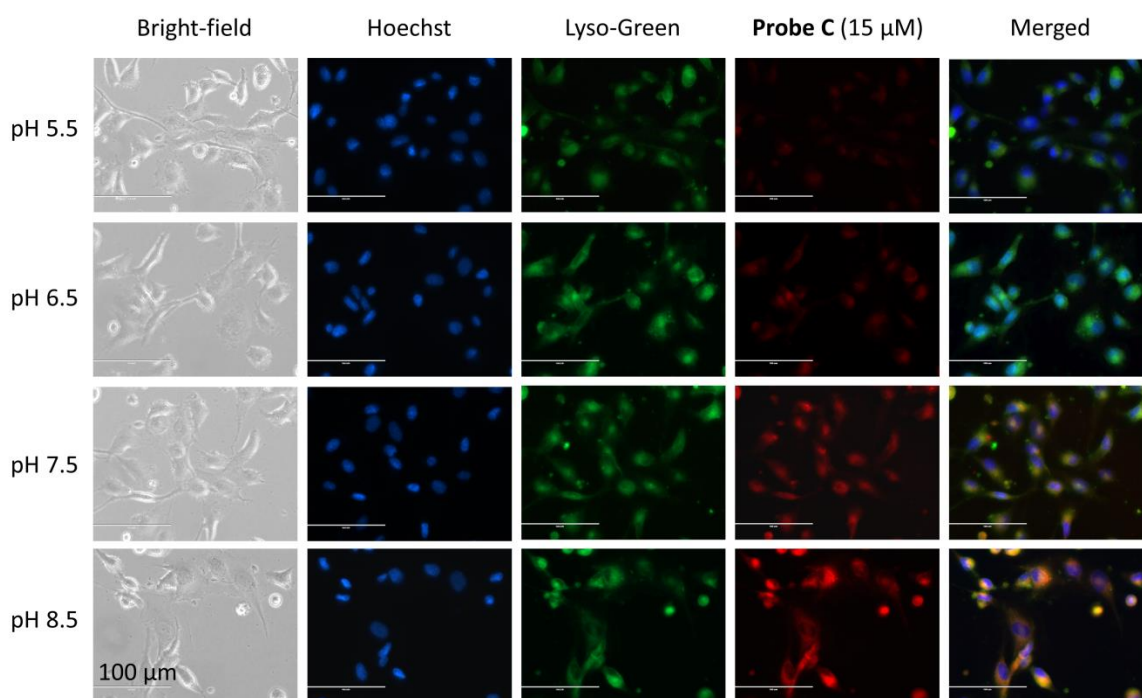

**Figure S19.** Fluorescence images of HUVEC-C cells incubated with 15 μM fluorescent probe **C** at different intracellular pH values. Intracellular pH were tuned by using nigericin ( $5 \mu\text{g}\cdot\text{mL}^{-1}$ ) in 2 mL potassium rich PBS at different pH values (5.5, 6.5, 7.5, or 8.5). HUVEC-C cells were incubated with fluorescent probe **C** for 2 h and imaged for colocalization with 1 μM LysoSensor Green and ( $1 \mu\text{g}\cdot\text{mL}^{-1}$ ) Hoechst 33342 stains. Images were acquired using the inverted fluorescence microscope (AMF-4306, EVOSfl, AMG) at 40× magnification.

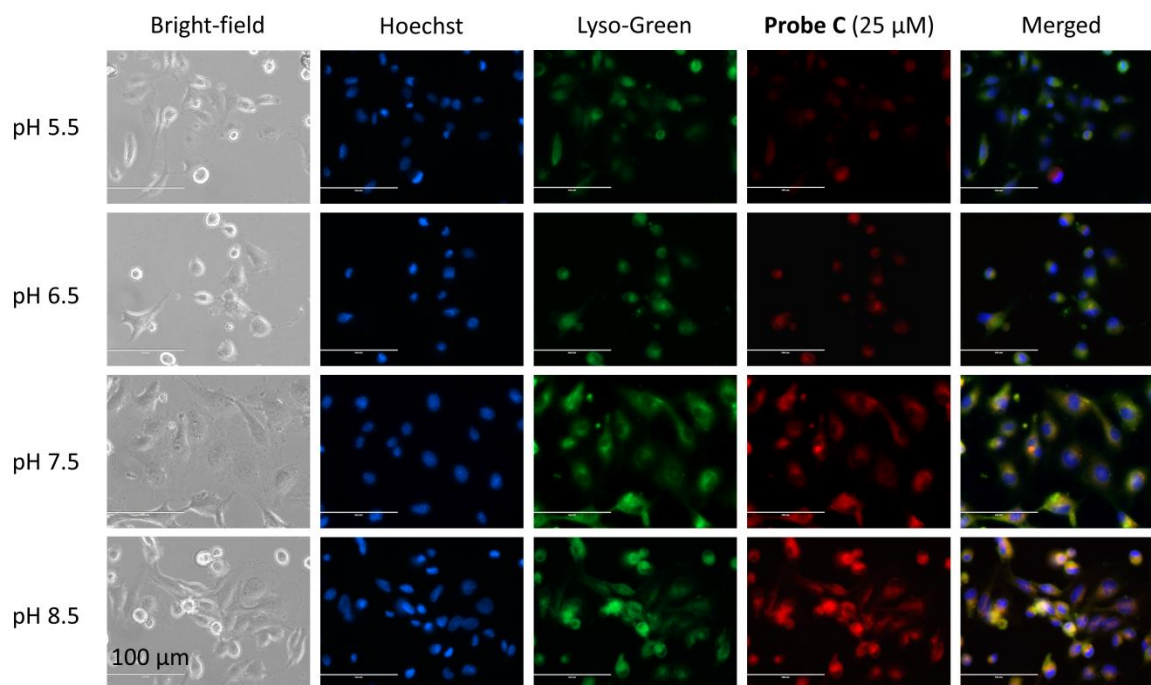

**Figure S20.** Fluorescence images of HUVEC-C cells incubated with 25  $\mu\text{M}$  fluorescent probe **C** at different intracellular pH values. Intracellular pH were tuned by using nigericin ( $5 \mu\text{g}\cdot\text{mL}^{-1}$ ) in 2 mL potassium rich PBS at different pH values (5.5, 6.5, 7.5, or 8.5). HUVEC-C cells were incubated with probe **C** for 2 h and imaged for colocalization with 1  $\mu\text{M}$  LysoSensor Green and ( $1 \mu\text{g}\cdot\text{mL}^{-1}$ ) Hoechst 33342 stains. Images were acquired using the inverted fluorescence microscope (AMF-4306, EVOSfl, AMG) at 40 $\times$  magnification.

## Reference:

1. Velapoldi, R. A.; Tonnesen, H. H., Corrected Emission Spectra and Quantum Yields for A Series of Fluorescent Compounds in The Visible Spectral Region. *Journal of Fluorescence* **2004**, *14*, 465-472.
2. Kubin, R. F.; Fletcher, A. N., Fluorescence Quantum Yields of Some Rhodamine Dyes. *Journal of Luminescence* **1982**, *27*, 455-462.
3. Du, H.; Fuh, R. C. A.; Li, J. Z.; Corkan, L. A.; Lindsey, J. S., Photochemcad: A Computer-aided Design and Research Tool in Photochemistry. *Photochemistry and Photobiology* **1998**, *68*, 141-142.
4. Cielen, E.; Tahri, A.; Heyen, K. V.; Hoornaert, G. J.; De Schryver, F. C.; Boens, N., Synthesis and Spectroscopic Characterisation of Fluorescent Indicators for  $\text{Na}^+$  and  $\text{K}^+$ . *Journal of the Chemical Society-Perkin Transactions 2* **1998**, 1573-1580.

\*Full author list for the reference 15 in the main paper:

Frisch, M. J.; Trucks, G. W.; Schlegel, H. B.; Scuseria, G. E.; Robb, M. A.; Cheeseman, J. R.; Scalmani, G.; Barone, V.; Mennucci, B.; Petersson, G. A.; Nakatsuji, H.; Caricato, M.; Li, X.; Hratchian, H. P.; Izmaylov, A. F.; Bloino, J.; Zheng, G.; Sonnenberg, J. L.; Hada, M.; Ehara, M.; Toyota, K.; Fukuda, R.; Hasegawa, J.; Ishida, M.; Nakajima, T.; Honda, Y.; Kitao, O.; Nakai, H.; Vreven, T.; Montgomery, J. A.; Peralta, Jr., J. E.; Ogliaro, F.; Bearpark, M.; Heyd, J. J.; Brothers, E.; Kudin, K. N.; Staroverov, V. N.; Kobayashi, R.; Normand, J.; Raghavachari, K.; Rendell, A.; Burant, J. C.; Iyengar, S. S.; Tomasi, J.; Cossi, M.; Rega, N.; Millam, J. M.; Klene, M.; Knox, J. E.; Cross, J. B.; Bakken, V.; Adamo, C.; Jaramillo, J.; Gomperts, R.; Stratmann, R. E.; Yazyev, O.; Austin, A. J.; Cammi, R.; Pomelli, C.; Ochterski, J. W.; Martin, R. L.; Morokuma, K.; Zakrzewski, V. G.; Voth, G. A.; Salvador, P.; Dannenberg, J. J.; Dapprich, S.; Daniels, A. D.; Farkas, Ö.; Foresman, J. B.; Ortiz, J. V.; Cioslowski, J.; Fox, D. J.
